# Supplementary material for: A randomised controlled non-inferiority trial of primary care-based facilitated access to an alcohol reduction website (EFAR Spain): the study protocol
Source: PubMed Central journal article supplement — BMJ Open. 2014 Dec 31;4(12):e007130. doi: 10.1136/bmjopen-2014-007130 (PMC4281557; doi:10.1136/bmjopen-2014-007130), 2014-12-31

# BMJ Open

## A randomised controlled non-inferiority trial of primary care-based facilitated access to an alcohol reduction website (EFAR Spain): the study protocol.

|                                 |                                                                                                                                                                                                                                                                                                                                                                                                                                                                                                                                                                                                                                                                                                                                                                  |
|---------------------------------|------------------------------------------------------------------------------------------------------------------------------------------------------------------------------------------------------------------------------------------------------------------------------------------------------------------------------------------------------------------------------------------------------------------------------------------------------------------------------------------------------------------------------------------------------------------------------------------------------------------------------------------------------------------------------------------------------------------------------------------------------------------|
| Journal:                        | <i>BMJ Open</i>                                                                                                                                                                                                                                                                                                                                                                                                                                                                                                                                                                                                                                                                                                                                                  |
| Manuscript ID:                  | bmjopen-2014-007130                                                                                                                                                                                                                                                                                                                                                                                                                                                                                                                                                                                                                                                                                                                                              |
| Article Type:                   | Protocol                                                                                                                                                                                                                                                                                                                                                                                                                                                                                                                                                                                                                                                                                                                                                         |
| Date Submitted by the Author:   | 06-Nov-2014                                                                                                                                                                                                                                                                                                                                                                                                                                                                                                                                                                                                                                                                                                                                                      |
| Complete List of Authors:       | López-Pelayo, Hugo; Fundació Clínic per la Recerca Biomèdica, Addictions Unit<br>Wallace, Paul; University College London,<br>Segura, Lidia; Agència Salut Pública Catalunya,<br>Miquel, Laia; Institut d'Investigacions Biomèdiques August Pi i Sunyer,<br>Díaz, Estela; Agència Salut Pública Catalunya,<br>Teixidó, Lidia; Hospital Clínic Barcelona,<br>Baena, Begoña; Agència Salut Pública Catalunya,<br>Struzzo, Pierluigio; , Regional Centre for the Training in Primary Care,<br>Palacio-Vieria, Jorge; Agència Salut Pública Catalunya,<br>Casajuana, Cristina; Institut d'Investigacions Biomèdiques August Pi i Sunyer,<br>Colom, Joan; Agència Salut Pública Catalunya,<br>Gual, Antoni; Institut d'Investigacions Biomèdiques August Pi i Sunyer, |
| <b>Primary Subject Heading</b>: | Addiction                                                                                                                                                                                                                                                                                                                                                                                                                                                                                                                                                                                                                                                                                                                                                        |
| Secondary Subject Heading:      | Patient-centred medicine, Mental health, General practice / Family practice                                                                                                                                                                                                                                                                                                                                                                                                                                                                                                                                                                                                                                                                                      |
| Keywords:                       | Substance misuse < PSYCHIATRY, Clinical trials < THERAPEUTICS, World Wide Web technology < BIOTECHNOLOGY & BIOINFORMATICS                                                                                                                                                                                                                                                                                                                                                                                                                                                                                                                                                                                                                                        |
|                                 |                                                                                                                                                                                                                                                                                                                                                                                                                                                                                                                                                                                                                                                                                                                                                                  |

SCHOLARONE™  
Manuscripts

**Word count: 1782**

**Abstract count: 295**

**Number of figures: 1**

**Number of tables: 0**

A randomised controlled non-inferiority trial of primary care-based facilitated access to an alcohol reduction website (EFAR Spain): the study protocol.

Hugo López-Pelayo<sup>1</sup>; Paul Wallace<sup>3</sup>; Lidia Segura<sup>4</sup>; Laia Miquel<sup>2</sup>; Estela Díaz<sup>4</sup>; Lidia Teixidó<sup>1</sup>; Begoña Baena<sup>4</sup>; Pierluigio Struzzo<sup>5</sup>; Jorge Palacio-Vieira<sup>4</sup>; Cristina Casajuana<sup>2</sup>; Joan Colom<sup>4</sup>; Antoni Gual<sup>2</sup>

#### **Author affiliations**

1 GRAC. Addictions Unit. Department of Psychiatry, Clinical Institute of Neuroscience, Hospital Clínic. Fundació Clínic Recerca Biomèdica (FCRB), RETICS, University of Barcelona. Barcelona, Spain.

2 GRAC. Addictions Unit. Department of Psychiatry, Clinical Institute of Neuroscience, Hospital Clínic. Institut d'Investigacions Biomèdiques August Pi i Sunyer (IDIBAPS), RETICS, University of Barcelona. Barcelona, Spain.

3 Department of Primary Care and Population Health, University College London, London, UK

4 Program on Substance Abuse, Public Health Agency, Government of Catalonia, Barcelona, Spain

5 Region Friuli Venezia Giulia, Regional Centre for the Training in Primary Care, Monfalcone, Italy

**Corresponding author:** Hugo López-Pelayo [hlopez@clinic.cat](mailto:hlopez@clinic.cat)

## Abstract

**Introduction:** Early identification (EI) and brief interventions (BIs) for risky drinkers are effective tools in primary care. Lack of time in daily practice has been identified as one of the main barriers to implementation of BI. There is growing evidence that facilitated access by primary health care professionals (PCHPs) to a web-based BI can be a time-saving alternative to standard face-to-face BIs but there is as yet no evidence about the effectiveness of this approach relative to conventional BI. The main aim of this study is to test non-inferiority of facilitation to a web-based BI for risky drinkers delivered by PHCP (nurse or GP) against face-to-face BI.

**Method and Analysis:** Randomised controlled non-inferiority trial comparing both interventions, to be performed in primary care health centres in Catalonia, Spain. Unselected adult patients attending participating centres will be given a leaflet inviting them to log on to a website to complete the AUDIT-C alcohol screening questionnaire. Screen positives will be requested online to complete a trial module including consent, baseline assessment and randomisation to either face to face brief intervention by the practitioner or brief intervention via the alcohol reduction website. Follow up assessment of risky drinking will be undertaken online at 3 months and 1 year using the full AUDIT and D5-EQD5 scale. Proportions of risky drinkers in each group will be calculated and non-inferiority assessed against a specified margin of 10%. Assuming reduction of 30% of risky drinkers receiving standard intervention, 1000 patients will be required to give 90% power to reject the null hypothesis

**Ethics and dissemination:** The protocol was approved by the Ethics Committee of IDIAP Jordi Gol i Gurina P14/028. The findings of the trial will be disseminated through peer-reviewed journals, national and international conference presentations.

**Registration details:** Trial registration number NCT02082990

## Introduction

Risky drinking is a worldwide public health problem. 74% of Europeans aged 15 years or older drink alcohol and 15 % of them (58 million people) drink above the recommended level(1). Around the world, 3,8% of premature deaths and 4,6% of Disability Adjusted Life Years (DALYs) lost are attributable to alcohol use (2).

One out of five patients attended in primary health care are risky drinkers (3). However, the proportion of people who access treatment out of those who need it, varies from just 4% to 14% (4, 5). Early Identification (EI) and brief intervention (BI) are among the most effective approaches for risky drinkers in primary health care (6, 7). However, there is an important gap between research and clinical practice (8). Less than 10% of risky drinkers attended in primary health care benefit from BI (7). The main barriers to implementing EI&BI in primary care are time constraints, lack of financial incentives, insufficient training or absence of services to refer patient to, and risk of upsetting patient (4).

Web-Based Brief Interventions (e-BI) are an alternative to improve the implementation, acceptance and viability of BI and to overcome barriers which have hampered their use in daily practice (9, 10). The provision of facilitated access by primary care professionals to an alcohol reduction website could significantly increase brief intervention rates by offering a time-saving alternative to face to face intervention. Many studies have shown the efficacy of computer-based interventions in getting college students to reduce their alcohol consumption (11, 12). The use of new technologies for mental health problems is becoming common in primary care, as for example in smoking cessation (13). A review of trials of computer based interventions in college drinkers found them to be more effective than no treatment and as effective as alternative treatment approaches (11).

Down Your Drink (<http://www.downyourdrink.org.uk>) is an online intervention developed in United Kingdom based on BI, cognitive-behaviour therapy, self-control therapy and motivational interviewing. An online trial of Down Your Drink indicated potentially significant reductions in alcohol consumption and risky drinking behaviours in subjects who used the trial websites (14) and following this, a number of initiatives have been initiated to test the acceptability and effectiveness of facilitating access to websites of this kind in primary care settings. The EU-funded ODHIN trial (15) currently underway in 5 European countries is designed to determine the impact of facilitated access on levels of implementation of brief interventions by primary care practitioners. The EFAR FVG study in the Friuli Venezia Giulia region in Northern Italy (16) has been designed to test the effectiveness relative to face to face intervention of facilitated access to an Italian version of DownYourDrink by general practitioners. This trial involves 40 general practices and has recruited more than 500 patients(16).

In Catalonia, no efficacy studies on e-BI exist. However, some limited e-BI initiatives have been undertaken in order to support the implementation of the “Beveu Menys” program (17), a program aimed at implementing EI&BI by, among other strategies, identifying a Network of Alcohol Referents in Primary Health Care (XaROH) throughout the territory and providing continuous training and support to them. An on-line quantity-frequency tool was developed and promoted to be used as general population awareness-raising tool with promising results (18). More recently, in the context of the ODHIN project (19), an e-BI tool, adapted from Drinkers Check-Up (20), was used to test facilitated access only but results are still under analysis.

1  
2  
3 We present the protocol of the study which aims to test non-inferiority of a web-based BI  
4 for risky drinkers against a traditional face-to-face BI delivered by PHCP (nurse and GPs).  
5  
6

## 7 **Method**

8 **Trial design:** Randomized non-inferiority controlled trial in primary care comparing  
9 facilitated access to web-site for risky drinkers with standard face-to-face BI. With the  
10 exception of the non-experimental intervention, all components of the study will be  
11 administered online to patients. Patients will be actively encouraged by their primary health  
12 care professional to access to the application which is available on the web-site of the  
13 program “Beveu Menys”, from the Program on Substance Abuse of the Government of  
14 Catalonia, and will be provided with a unique registration code.  
15

16 **The trial web-site** is a Spanish adaptation from English version of  
17 www.DownYourDrink.org.uk controlled trials (DYD) developed in the UK, which includes  
18 modules for all the key trial components including screening, consent, assessment,  
19 randomisation and follow-up. It also incorporates the alcohol reduction website for the  
20 patients in the experimental group. The site has been adapted from the  
21 www.DownYourDrink.org.uk (DYD) website developed for the DYD-RCT trial (14). Details of  
22 DYD and the psychological theory which underpinned its development have been reported  
23 elsewhere(21). Country-specific information such as recommended guidelines for alcohol  
24 intake, definitions of standard drinks and alcohol-related laws will be included. The website  
25 also incorporates a menu-driven facility to enable PHCP to customize automated messages  
26 to patients, for example by adding photographs and pre-recorded messages. The  
27 personalised messages will appear to each patient using the log in code provided by that  
28 practitioner.  
29

30  
31 **Practitioner recruitment, training and incentives:** Recruitment will be based on the XarOH  
32 network. A 3-hour seminar on new technologies and EI&BI, introducing the trial, will be  
33 offered to all members of the XarOH and those attending will be invited to sign up for the  
34 trial. In addition, several advertisements will be posted on the XarOH website platform  
35 offering participation in the trial. In selecting practices, preference will be given to those  
36 with at least 5000 registered patients. Those practices which are selected as participants will  
37 be required to undergo a one day training programme. The training has four steps: 1)  
38 Introduction to trial; 2) Familiarisation with website; 3) Update about EI&BI; 4) Practice in  
39 EI&BI (Role-playing). Finally, participants will be encouraged to use the web-site and tailor  
40 patient messages. Participating PHCPs will receive a financial incentive of €20 per patient  
41 recruited to the trial.  
42

## 43 **Patient eligibility**

44 **Inclusion criteria:** patients aged 18 years or older attending the participating practices  
45 during the study period.  
46

47 **Exclusion criteria:** those suffering from severe psychiatric disorders, serious visual  
48 impairment or terminal illness, those having inadequate command of the Spanish or Catalan  
49 language, or AUDIT  $\geq$  18 in baseline assessment. Excluded patients will be referred to PHCP  
50 to consider other interventions.  
51

52 **Screening and Consent:** Eligible patients will be given a trial brochure by their GP or  
53 nurse and actively encouraged to access the specially designed website hosted on the web-  
54 site of the program “Beveu Menys.” Each brochure will include a unique access number  
55 which will enable the patient to log on to the website. All patients who access to the web-  
56 site will be informed about the trial and will be asked to complete an online form confirming  
57  
58  
59  
60

1  
2  
3 that they do not meet any of the exclusion criteria and then be invited to complete the  
4 online consent module. They will be asked to complete online version of short Alcohol Use  
5 Disorders Identification Test (AUDIT-C) (22). Cut-off points for the purpose of the trial will be  
6 4 for women and 5 for men. Those screening negative will be informed that their responses  
7 indicated acceptable drinking patterns according to national guidelines and will be  
8 encouraged not to increase their alcohol consumption. Those scoring at or above the cut-  
9 off point will be invited by tailored online message from their PCHP to take part in the study  
10 as they present risky drinking pattern (See figure 1).

11  
12 **Baseline assessment:** includes a demographic questionnaire (age, gender, level of education  
13 and occupation), the 10- question Alcohol Use Disorder Test Spanish version (23) and D5-EQ  
14 D5, the quality-of-life questionnaire, validated in Spanish versions (24, 25).

15  
16 **Randomisation:** Those patients who complete the baseline assessment will undergo  
17 automated online randomisation (1:1). Experimental group patients will be taken direct to  
18 the registration page of the alcohol reduction website where they will receive the personalised  
19 message from the PHCP who gave them the brochure with tailored feedback about their  
20 responses to the alcohol questionnaires. Personalised online messages from their PHCP will  
21 inform the patients of the importance of adopting healthy drinking choices and will  
22 encourage them to spend at least 15 minutes engaging with the alcohol reduction website  
23 in the first instance. The patients will also receive an email one week later encouraging them  
24 to log on again to review their alcohol consumption. Online messages will also encourage  
25 the patients to discuss their website experience when they next see their PHCP.

26  
27 Reference group patients will receive an online message asking them to make an  
28 appointment to see their PCHP to discuss their drinking, and an automatically generated e-  
29 mail will also be sent to their PCHP to set up a visit in the next 7-10 days. At the  
30 appointment, the patient will receive a face to face brief motivational interview with the  
31 following components: 1) Assessment of the motivation to change. 2) Assessment of the  
32 stage of change. 3) Advice on changing drinking pattern. 4) Empathy. 5) Capacity Building.

33  
34 Non-attenders will be offered up to three additional recalls.

#### 35 **Follow-up assessment**

36  
37 Follow-up will take place at 3 and 12 months after randomisation, and each assessment will  
38 consist of the following instruments:

- 39 1. The 10-question AUDIT validated Spanish version.
- 40 2. D quality of life questionnaire, validated Spanish version 5—The EQ.

41  
42 Up to 3 attempts by e-mail will be made to ensure follow-up. The last attempt will be made  
43 by PHCP by letter, phone or in person

#### 44 **Statistical analysis**

45  
46 The primary outcome will be the proportion of patients classified as risky drinkers by the  
47 AUDIT-10 at month 3 after the randomization.

48 Aiming to assess the non-inferiority of facilitated access compared with standard face-to-  
49 face intervention, the proportion of risky drinkers in both groups will be compared using  
50 generalised non-linear mixed models. Non-inferiority will be considered if the difference  
51 between groups is not greater than 10%. Accepting a reduction of 30% in the proportion of  
52 risky drinkers in control group and expecting an overall attrition of 10%, 500 patients in each  
53 group will be needed to reject the null hypothesis (facilitated access is inferior to standard  
54 face-to-face intervention) with the trial 90% power.

1  
2  
3 All analysis details will be set up in a pre-designated statistical analysis plan before the data  
4 are accessed.  
5

6  
7 ***Impact on screening rates of facilitated access to the alcohol reduction web-site***

8 It is hypothesised that the use of facilitated access to the alcohol reduction website will lead  
9 to an increase in alcohol screening rates in the trial practices. A sub-study will therefore be  
10 carried out comparing pre- and post-trial alcohol screening rates in the participating  
11 practices, calculated on the basis of entries in the electronic care records of patients  
12 attending over a six month period. Further analysis will be carried out with a matched  
13 control group of practices who did not participate in the EFAR trial.  
14  
15  
16  
17  
18  
19  
20  
21  
22  
23  
24  
25  
26  
27  
28  
29  
30  
31  
32  
33  
34  
35  
36  
37  
38  
39  
40  
41  
42  
43  
44  
45  
46  
47  
48  
49  
50  
51  
52  
53  
54  
55  
56  
57  
58  
59  
60

**Author affiliations**

1 GRAC. Addictions Unit. Department of Psychiatry, Clinical Institute of Neuroscience, Hospital Clínic. Fundació Clínic Recerca Biomèdica (FCRB), RETICS, Barcelona, Spain.

2 GRAC. Addictions Unit. Department of Psychiatry, Clinical Institute of Neuroscience, Hospital Clínic. Institut d'Investigacions Biomèdiques August Pi i Sunyer (IDIBAPS), RETICS, Barcelona, Spain.

3 Department of Primary Care and Population Health, University College London, London, UK

4 Program on Substance Abuse, Public Health Agency, Government of Catalonia, Barcelona, Spain

5 Region Friuli Venezia Giulia, Regional Centre for the Training in Primary Care, Monfalcone, Italy

**Contributors**

HL, AG, LS and PW are the principal investigators who designed the study and drafted the article. Other authors have made substantial contributions to the conception and design of the project. All authors read and approved the final manuscript.

**Funding**

This work has been funded by project PI042924 integrated in the National R + D + I and funded by the Carlos III Health Institute-Deputy General Assessment and the European Regional Development Fund (ERDF)."

**Competing interest**

Antoni Gual has received honoraria, research grants and travel grants from Lundbeck Janssen, Pfizer, Lilly, Abbvie D&A Pharma, and Servier. Hugo López-Pelayo has received travel grants from Lundbeck, Lilly, Janssen, Pfizer, Rovi and Esteve. Other authors have no conflicts of interest.

**Ethics approval**

The protocol was approved on P14/028 by the Ethics Committee, IDIAP Jordi Gol i Gurina.

**Acknowledgments**

This work is supported by following institutions: University College of London (UCL), Institut d'Investigacions Biomèdiques August Pi i Sunyer (IDIBAPS), Hospital Clínic i Universitari de Barcelona, and the Program on Substance Abuse (Public Health Agency, Government of Catalonia)



Figure 1. Flowchart: recruitment process.

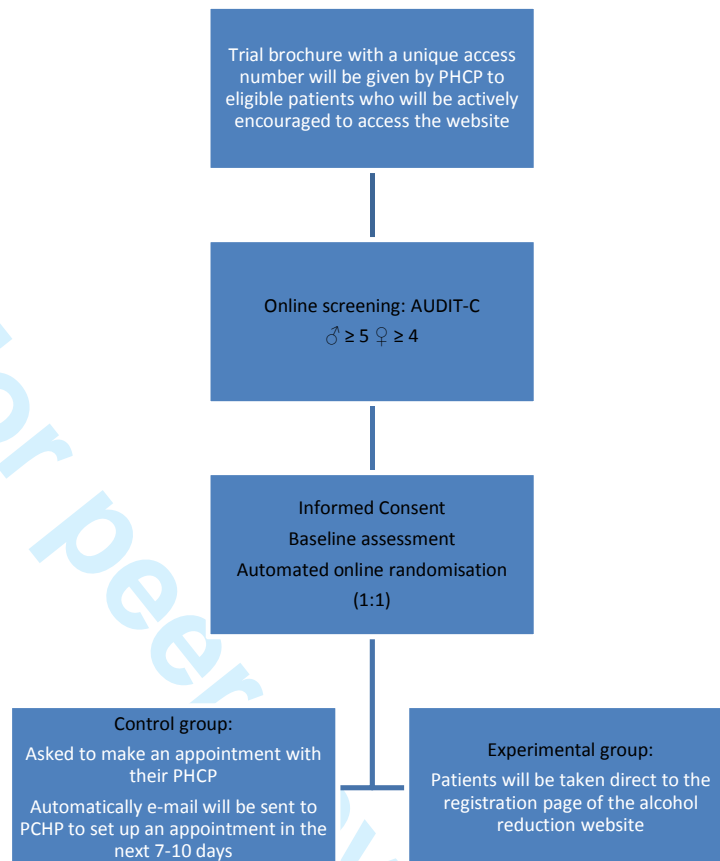

## References

1. Gual A, Anderson P. A new AMPHORA: an introduction to the project Alcohol Measures for Public Health Research Alliance. *Addiction*. 2011 Mar;106:1-3.
2. Rehm J, Mathers C, Popova S, Thavorncharoensap M, Teerawattananon Y, Patra J. Alcohol and Global Health 1 Global burden of disease and injury and economic cost attributable to alcohol use and alcohol-use disorders. *Lancet*. 2009 Jun-Jul;373(9682):2223-33.
3. Segura Garcia L, Gual Sole A, Montserrat Mestre O, Bueno Belmonte A, Colom Farran J. Detection and handling of alcohol problems in primary care in Catalonia. *Atencion primaria / Sociedad Espanola de Medicina de Familia y Comunitaria*. 2006 2006-May-31;37(9):484-8.
4. Wolstenholme A, Drummond C, Deluca P, Davey Z, Elzerbi C, Gual A, et al. Report on the mapping of European need and service provision for early diagnosis and treatment of alcohol use disorders 2013.
5. Drummond C, Wolstenholme A, Deluca P, Davey Z, Donoghue K, Elzerbi C, et al. Alcohol interventions and treatment in Europe. In: Anderson P, Braddick F, Reynolds J, Gual A, editors. *Alcohol Policy in Europe: Evidence from AMPHORA The AMPHORA project 2nd ed* 2013.
6. Kaner EFS, Dickinson HO, Beyer F, Pienaar E, Schlesinger C, Campbell F, et al. The effectiveness of brief alcohol interventions in primary care settings: A systematic review. *Drug and Alcohol Review*. 2009 May;28(3):301-23.
7. Anderson P, Chisholm D, Fuhr DC. Alcohol and Global Health 2 Effectiveness and cost-effectiveness of policies and programmes to reduce the harm caused by alcohol. *Lancet*. 2009 Jun-Jul;373(9682):2234-46.
8. Sheffield Uo. *Guidance: Prevention and early identification of alcohol use disorders in adults and young people* 2009.
9. Shakeshaft A, Fawcett J, Mattick RP, Richmond R, Wodak A, Harris MF, et al. Patient-driven computers in primary care: their use and feasibility. *Health Education*. 2006 2006;106(5):400-11.
10. Shakeshaft AP, Frankish CJ. Using patient-driven computers to provide cost-effective prevention in primary care: a conceptual framework. *Health Promotion International*. 2003 Mar;18(1):67-77.
11. Carey KB, Scott-Sheldon LAJ, Elliott JC, Bolles JR, Carey MP. Computer-delivered interventions to reduce college student drinking: a meta-analysis. *Addiction*. 2009 Nov;104(11):1807-19.
12. Champion KE, Newton NC, Barrett EL, Teesson M. A systematic review of school-based alcohol and other drug prevention programs facilitated by computers or the Internet. *Drug and Alcohol Review*. 2013 Mar;32(2):115-23.
13. Free C, Knight R, Robertson S, Whittaker R, Edwards P, Zhou W, et al. Smoking cessation support delivered via mobile phone text messaging (txt2stop): a single-blind, randomised trial. *Lancet*. 2011 Jul 2;378(9785):49-55.
14. Wallace P, Murray E, McCambridge J, Khadjesari Z, White IR, Thompson SG, et al. On-line Randomized Controlled Trial of an Internet Based Psychologically Enhanced Intervention for People with Hazardous Alcohol Consumption. *Plos One*. 2011 Mar 9;6(3).
15. ODHIN. The ODHIN (Optimizing delivery of health care interventions) project website. 2013; Available from: <http://www.odhinproject.eu/>.

- 1  
2  
3 16. Struzzo P, Scafato E, McGregor R, Della Vedova R, Verbano L, Lygidakis C, et al. A  
4 randomised controlled non-inferiority trial of primary care-based facilitated access to an  
5 alcohol reduction website (EFAR-FVG): the study protocol. *Bmj Open*. 2013 2013;3(2).  
6 17. Catalunya Gd. Programa "Beveu menys". 2014; Available from:  
7 [http://www20.gencat.cat/portal/site/canalsalut/menuitem.41e04b39494f1be3ba963bb4b0c0e1a0/?vgnextoid=e0684fb23d564310VgnVCM2000009b0c1e0aRCRD&vgnnextchannel=e0684fb23d564310VgnVCM2000009b0c1e0aRCRD&newLang=es\\_ES](http://www20.gencat.cat/portal/site/canalsalut/menuitem.41e04b39494f1be3ba963bb4b0c0e1a0/?vgnextoid=e0684fb23d564310VgnVCM2000009b0c1e0aRCRD&vgnnextchannel=e0684fb23d564310VgnVCM2000009b0c1e0aRCRD&newLang=es_ES).  
8  
9  
10 18. Segura L, Torres M, Vidal A, Gual A, Colom J, editors. Utility of internet based  
11 assessment tool to measure alcohol consumption 2013.  
12 19. Keurhorst MN, Anderson P, Spak F, Bendtsen P, Segura L, Colom J, et al.  
13 Implementing training and support, financial reimbursement, and referral to an internet-based  
14 brief advice program to improve the early identification of hazardous and harmful alcohol  
15 consumption in primary care (ODHIN): study protocol for a cluster randomized factorial  
16 trial. *Implementation Science*. 2013 Jan 24;8.  
17 20. Hester RK, Squires DD, Delaney HD. The Drinker's Check-up: 12-month outcomes  
18 of a controlled clinical trial of a stand-alone software program for problem drinkers. *Journal*  
19 *of Substance Abuse Treatment*. 2005 Mar;28(2):159-69.  
20 21. Linke S, McCambridge J, Khadjesari Z, Wallace P, Murray E. Development of a  
21 Psychologically Enhanced Interactive Online Intervention for Hazardous Drinking. *Alcohol*  
22 *and Alcoholism*. 2008 Nov-Dec;43(6):669-74.  
23 22. Gómez A, Conde A, Santana JM, Jorrín A. Diagnostic usefulness of brief versions of  
24 Alcohol Use Disorders Identification Test (AUDIT) for detecting hazardous drinkers in  
25 primary care settings. *Journal of Studies on Alcohol*. 2005;66(2):305-8.  
26 23. Contel Guillaumon M, Gual Sole A, Colom Farran J. Alcohol use disorders  
27 identification test (AUDIT): Translation and validation of Catalan and Spanish. Test para la  
28 identificacion de transtornos por uso de alcohol (AUDIT): Traducción y validación del audit  
29 al Catalan y Castellano. 1999;11(4):337-47.  
30 24. Badia X, Roset M, Montserrat S, Herdman M, Segura A. The Spanish version of the  
31 EuroQol: Description and applications. La versión española del EuroQol: Descripción y  
32 aplicaciones. 1999;112(SUPPL. 1):79-86.  
33 25. Badia X, Schiaffino A, Alonso J, Herdman M. Using the EuroQol 5-D in the Catalan  
34 general population: Feasibility and construct validity. *Quality of Life Research*.  
35 1998;7(4):311-22.  
36  
37  
38  
39  
40  
41  
42  
43  
44  
45  
46  
47  
48  
49  
50  
51  
52  
53  
54  
55  
56  
57  
58  
59  
60

# BMJ Open

## A randomised controlled non-inferiority trial of primary care-based facilitated access to an alcohol reduction website (EFAR Spain): the study protocol.

|                                 |                                                                                                                                                                                                                                                                                                                                                                                                                                                                                                                                                                                                                                                                                                                                                                  |
|---------------------------------|------------------------------------------------------------------------------------------------------------------------------------------------------------------------------------------------------------------------------------------------------------------------------------------------------------------------------------------------------------------------------------------------------------------------------------------------------------------------------------------------------------------------------------------------------------------------------------------------------------------------------------------------------------------------------------------------------------------------------------------------------------------|
| Journal:                        | <i>BMJ Open</i>                                                                                                                                                                                                                                                                                                                                                                                                                                                                                                                                                                                                                                                                                                                                                  |
| Manuscript ID:                  | bmjopen-2014-007130.R1                                                                                                                                                                                                                                                                                                                                                                                                                                                                                                                                                                                                                                                                                                                                           |
| Article Type:                   | Protocol                                                                                                                                                                                                                                                                                                                                                                                                                                                                                                                                                                                                                                                                                                                                                         |
| Date Submitted by the Author:   | 05-Dec-2014                                                                                                                                                                                                                                                                                                                                                                                                                                                                                                                                                                                                                                                                                                                                                      |
| Complete List of Authors:       | López-Pelayo, Hugo; Fundació Clínic per la Recerca Biomèdica, Addictions Unit<br>Wallace, Paul; University College London,<br>Segura, Lidia; Agència Salut Pública Catalunya,<br>Miquel, Laia; Institut d'Investigacions Biomèdiques August Pi i Sunyer,<br>Díaz, Estela; Agència Salut Pública Catalunya,<br>Teixidó, Lidia; Hospital Clínic Barcelona,<br>Baena, Begoña; Agència Salut Pública Catalunya,<br>Struzzo, Pierluigio; , Regional Centre for the Training in Primary Care,<br>Palacio-Vieria, Jorge; Agència Salut Pública Catalunya,<br>Casajuana, Cristina; Institut d'Investigacions Biomèdiques August Pi i Sunyer,<br>Colom, Joan; Agència Salut Pública Catalunya,<br>Gual, Antoni; Institut d'Investigacions Biomèdiques August Pi i Sunyer, |
| <b>Primary Subject Heading</b>: | Addiction                                                                                                                                                                                                                                                                                                                                                                                                                                                                                                                                                                                                                                                                                                                                                        |
| Secondary Subject Heading:      | Patient-centred medicine, Mental health, General practice / Family practice                                                                                                                                                                                                                                                                                                                                                                                                                                                                                                                                                                                                                                                                                      |
| Keywords:                       | Substance misuse < PSYCHIATRY, Clinical trials < THERAPEUTICS, World Wide Web technology < BIOTECHNOLOGY & BIOINFORMATICS                                                                                                                                                                                                                                                                                                                                                                                                                                                                                                                                                                                                                                        |
|                                 |                                                                                                                                                                                                                                                                                                                                                                                                                                                                                                                                                                                                                                                                                                                                                                  |

SCHOLARONE™  
Manuscripts

**Word count: 2449**

**Abstract count: 300**

**Number of figures: 1**

**Number of tables: 0**

A randomised controlled non-inferiority trial of primary care-based facilitated access to an alcohol reduction website (EFAR Spain): the study protocol.

Hugo López-Pelayo<sup>1</sup>; Paul Wallace<sup>3</sup>; Lidia Segura<sup>4</sup>; Laia Miquel<sup>2</sup>; Estela Díaz<sup>4</sup>; Lidia Teixidó<sup>1</sup>; Begoña Baena<sup>4</sup>; Pierluigio Struzzo<sup>5</sup>; Jorge Palacio-Vieira<sup>4</sup>; Cristina Casajuana<sup>2</sup>; Joan Colom<sup>4</sup>; Antoni Gual<sup>2</sup>

#### **Author affiliations**

1 GRAC. Addictions Unit. Department of Psychiatry, Clinical Institute of Neuroscience, Hospital Clínic. Fundació Clínic Recerca Biomèdica (FCRB), RETICS, University of Barcelona. Barcelona, Spain.

2 GRAC. Addictions Unit. Department of Psychiatry, Clinical Institute of Neuroscience, Hospital Clínic. Institut d'Investigacions Biomèdiques August Pi i Sunyer (IDIBAPS), RETICS, University of Barcelona. Barcelona, Spain.

3 Department of Primary Care and Population Health, University College London, London, UK

4 Program on Substance Abuse, Public Health Agency, Government of Catalonia, Barcelona, Spain

5 Region Friuli Venezia Giulia, Regional Centre for the Training in Primary Care, Monfalcone, Italy

**Corresponding author:** Hugo López-Pelayo [hlopez@clinic.cat](mailto:hlopez@clinic.cat)

## Abstract

**Introduction:** Early identification (EI) and brief interventions (BIs) for risky drinkers are effective tools in primary care. Lack of time in daily practice has been identified as one of the main barriers to implementation of BI. There is growing evidence that facilitated access by primary health care professionals (PCHPs) to a web-based BI can be a time-saving alternative to standard face-to-face BIs but there is as yet no evidence about the effectiveness of this approach relative to conventional BI. The main aim of this study is to test non-inferiority of facilitation to a web-based BI for risky drinkers delivered by PHCP against face-to-face BI.

**Method and Analysis:** Randomised controlled non-inferiority trial comparing both interventions, to be performed in primary care health centres in Catalonia, Spain. Unselected adult patients attending participating centres will be given a leaflet inviting them to log on to a website to complete the AUDIT-C alcohol screening questionnaire. Participants with positive results will be requested online to complete a trial module including consent, baseline assessment and randomisation to either face to face brief intervention by the practitioner or brief intervention via the alcohol reduction website. Follow up assessment of risky drinking will be undertaken online at 3 months and 1 year using the full AUDIT and D5-EQD5 scale. Proportions of risky drinkers in each group will be calculated and non-inferiority assessed against a specified margin of 10%. Assuming reduction of 30% of risky drinkers receiving standard intervention, 1000 patients will be required to give 90% power to reject the null hypothesis

**Ethics and dissemination:** The protocol was approved by the Ethics Committee of IDIAP Jordi Gol i Gurina P14/028. The findings of the trial will be disseminated through peer-reviewed journals, national and international conference presentations.

**Registration details:** Trial registration number ClinicalTrials.gov NCT02082990

**Protocol version:** 2. October 2014

## Introduction

Risky drinking is a worldwide public health problem. 74% of Europeans aged 15 years or older drink alcohol and 15 % of them (58 million people) drink above the recommended level (1). Around the world, 3,8% of premature deaths and 4,6% of Disability Adjusted Life Years (DALYs) lost are attributable to alcohol use (2).

In Catalonia, one out of five patients attending primary health care are risky drinkers (3). However, the proportion of people who access treatment out of those who need it varies from just 4% (Germany) to 23% (Italy). In Spain, the percentage of the in-need population accessing treatment is 15.3% (4, 5)

Early Identification (EI) and brief intervention (BI) are among the most effective approaches for risky drinkers in primary health care (6, 7) However, there is an important gap between research and clinical practice (8). Less than 10% of risky drinkers attended in primary health care benefit from BI (7). The main barriers to implementing EI&BI in primary care are time constraints, lack of financial incentives, insufficient training or absence of services to refer patient to, and risk of upsetting patient (4). Web-Based Brief Interventions (e-BI) are an alternative to improve the implementation, acceptance and viability of BI and to overcome barriers which have hampered their use in daily practice (9, 10). The provision of facilitated access by primary care professionals to an alcohol reduction website could significantly increase brief intervention rates by offering a time-saving alternative to face to face intervention. Many studies have shown the efficacy of computer-based interventions in getting college students to reduce their alcohol consumption (11, 12). The use of new technologies for mental health problems is becoming common in primary care, as for example in smoking cessation (13). A review of trials of computer based interventions in college drinkers found them to be more effective than no treatment and as effective as alternative treatment approaches (11).

Down Your Drink (<http://www.downyourdrink.org.uk>) is an online intervention developed in United Kingdom based on BI, cognitive-behaviour therapy, self-control therapy and motivational interviewing. An online trial of Down Your Drink indicated potentially significant reductions in alcohol consumption and risky drinking behaviours in subjects who used the trial websites (14) and following this, a number of initiatives have been initiated to test the acceptability and effectiveness of facilitating access to websites of this kind in primary care settings. The EU-funded ODHIN trial (15) currently underway in 5 European countries is designed to determine the impact of facilitated access on levels of implementation of brief interventions by primary care practitioners. The EFAR FVG study in the Friuli Venezia Giulia region in Northern Italy (16) has been designed to test the effectiveness relative to face to face intervention of facilitated access to an Italian version of DownYourDrink by general practitioners. This trial involves 40 general practices and has recruited more than 500 patients(16). EFAR-Spain is based on EFAR-FVG, but there are the following differences: 1) participation is open to both doctors and nurses; 2) Primary health care centres are constituted by a team of different professionals (nursing, medicine, social work, administration, etc). 3) The website has been not only translated but also adapted to the Spanish culture.

In Catalonia, no efficacy studies on e-BI exist. However, some limited e-BI initiatives have been undertaken in order to support the implementation of the “Beveu Menys” program (17), a program aimed at implementing EI&BI by, among other strategies, identifying a Network of Alcohol Referents in Primary Health Care (XaROH) throughout the territory and

1  
2  
3 providing continuous training and support to them. An on-line quantity-frequency tool was  
4 developed and promoted to be used as general population awareness-raising tool with  
5 promising results (18). More recently, in the context of the ODHIN project (19), an e-BI tool,  
6 adapted from Drinkers Check-Up (20), was used to test facilitated access only but results are  
7 still under analysis.  
8

9 We present the protocol of a randomised controlled non-inferiority trial (1:1) which aims to  
10 test non-inferiority of a web-based BI for risky drinkers against a traditional face-to-face BI  
11 delivered by PHCP (nurse and GPs).  
12  
13

## 14 **Method**

15  
16 **Trial design:** Randomized non-inferiority controlled trial in primary care comparing  
17 facilitated access to web-site for risky drinkers with standard face-to-face BI. With the  
18 exception of the non-experimental intervention, all components of the study will be  
19 administered online to patients. Patients will be actively encouraged by their primary health  
20 care professional to access to the application which is available on the web-site of the  
21 program “Alcohol y Salud” (www.alcoholysalud.cat), and will be provided with a unique  
22 registration code.  
23

24 **The trial web-site** is a Spanish adaptation of the English version of  
25 www.DownYourDrink.org.uk (DYD) developed in the UK, which includes modules for all the  
26 key trial components including screening, consent, assessment, randomisation and follow-  
27 up. It also incorporates the alcohol reduction website for the patients in the experimental  
28 group. The site has been adapted from the www.DownYourDrink.org.uk (DYD) website  
29 developed for the DYD-RCT trial (14). Details of DYD and the psychological theory which  
30 underpinned its development have been reported elsewhere(21). Country-specific  
31 information such as recommended guidelines for alcohol intake, definitions of standard  
32 drinks and alcohol-related laws will be included. The website also incorporates a menu-  
33 driven facility to enable PHCP to customize automated messages to patients, for example by  
34 adding photographs and pre-recorded messages. The personalised messages will appear to  
35 each patient using the log-in code provided by that practitioner.  
36  
37

38 **Practitioner recruitment, training and incentives:** Recruitment will be based on the XaROH  
39 network. A 3-hour seminar on new technologies and EI&BI, introducing the trial, will be  
40 offered to all members of the XaROH and those attending will be invited to sign up for the  
41 trial. In addition, several advertisements will be posted on the “Beveu Menys” platform  
42 offering participation in the trial. In selecting practices, preference will be given to those  
43 with at least 5000 registered patients. Those practices which are selected as participants will  
44 be required to undergo a one day training programme. The training has four steps: 1)  
45 Introduction to trial; 2) Familiarisation with website; 3) Update about EI&BI; 4) Practice in  
46 EI&BI (Role-playing). Finally, participants will be encouraged to use the web-site and tailor  
47 patient messages. Participating PHCPs will receive a financial incentive of €20 per patient  
48 recruited to the trial.  
49  
50  
51  
52  
53  
54  
55  
56  
57  
58  
59  
60



### **Patient eligibility**

*Inclusion criteria:* patients aged 18 years or older attending the participating practices during the study period.

*Exclusion criteria:* those suffering from severe psychiatric disorders, serious visual impairment or terminal illness, those having inadequate command of the Spanish or Catalan language, or AUDIT  $\geq 18$  in baseline assessment. Excluded patients will be referred to PHCP to consider other interventions.

**Screening and Consent:** Eligible patients will be given a trial brochure by their GP or nurse and actively encouraged to access the specially designed website “www.alcoholysalud.cat.” Each brochure will include a unique access number which will enable the patient to log on to the website. All patients who access the web-site will be informed about the trial and asked to complete an online form confirming that they do not meet any of the exclusion criteria and inviting them to complete the online consent module. They will then be asked to complete an online version of the short Alcohol Use Disorders Identification Test (AUDIT-C) (22). Cut-off points for the purpose of the trial will be 4 for women and 5 for men. Those screening negative will be informed that their responses indicated acceptable drinking patterns according to national guidelines and will be encouraged not to increase their alcohol consumption. Those scoring at or above the cut-off point will be invited by tailored online message from their PCHP to take part in the study as they present a risky drinking pattern (See figure 1).

**Baseline assessment:** includes a demographic questionnaire (age, gender, level of education and occupation), the 10- question Alcohol Use Disorder Test Spanish version (23) and D5-EQ D5, the quality-of-life questionnaire, validated in Spanish versions (24, 25).

**Randomisation and intervention:** Those patients who complete the baseline assessment will undergo automated online randomisation by a specific module of website (1:1). Experimental group patients will be taken direct to the registration page of the alcohol reduction website “Alcohol y Salud” (www.alcoholysalud.cat), where they will receive a personalised message from the PHCP who gave them the brochure with tailored feedback about their responses to the alcohol questionnaires. Personalised online messages from their PHCP will inform the patients of the importance of adopting healthy drinking choices and will encourage them to spend at least 15 minutes engaging with the alcohol reduction website in the first instance. Each participating PHCP will have access to the section of website enabling them to personalize their messages. (see “Trial website”). Patients will also receive an email one week later encouraging them to log on again to review their alcohol consumption. Online messages will also encourage the patients to discuss their website experience when they next see their PHCP.

Control group patients will receive an online message asking them to make an appointment to see their PCHP to discuss their drinking, and an automatically generated e-mail will also be sent to their PCHP to set up a visit in the next 7-10 days. At the appointment, the patient will receive a face to face brief motivational interview with the following components: 1) Assessment of the motivation to change. 2) Assessment of the stage of change. 3) Advice on changing drinking pattern. 4) Empathy. 5) Capacity Building.

Non-attenders will be offered up to three additional recalls.

### **Follow-up assessment**

Follow-up will take place at 3 and 12 months after randomisation, and each assessment will consist of the following instruments:

1. The 10-question AUDIT validated Spanish version.

1  
2  
3 2. The EQ-5D-5 self-complete Spanish version (<http://www.euroqol.org/eq-5d-products/eq-5d-5l.html>)

4  
5 Up to 3 attempts by e-mail will be made to ensure follow-up. The last attempt will be made  
6 by PHCP by letter, phone or in person. There are no restrictions to concomitant care.  
7

### 8 ***Data security and storage***

9  
10 In order to ensure the security of personal data of participating patients and healthcare  
11 professionals, the site will be hosted on its own separate server which will be maintained  
12 and monitored closely throughout the project.

13 All communication between participants or PHCP and the web server will take place over an  
14 encrypted “http” connection.

15 Similarly, any interaction with the web-server by research staff or technical maintenance  
16 staff will be over a secure connection.

17  
18 Access to the website and web server will be restricted to a small number of research and  
19 technical staff. The data will be collected and stored in accordance with best practices. All  
20 data outcome data will be anonymised and identifiable only by a patient’s unique ID and  
21 code.  
22

23 Access to the final trial dataset will be limited to the research team.  
24  
25

### 26 ***Statistical analysis***

27  
28 The primary outcome will be the proportion of patients classified as risky drinkers by the  
29 AUDIT-10 at month 3 after the randomization.

30 Aiming to assess the non-inferiority of facilitated access compared with standard face-to-  
31 face intervention, the proportion of risky drinkers in both groups will be compared using  
32 generalised non-linear mixed models. Non-inferiority will be considered if the difference  
33 between groups is not greater than 10%. Based on an anticipated reduction of 30% in the  
34 proportion of risky drinkers in control group and an overall attrition of 10%, it is calculated  
35 that 500 patients in each group will be needed to reject the null hypothesis (facilitated  
36 access is inferior to standard face-to-face intervention) with 90% power.  
37

38 No interim analysis is planned.  
39

40 All analysis details will be set up in a pre-designated statistical analysis plan before the data  
41 are accessed.  
42  
43

### 44 ***Impact on screening rates of facilitated access to the web-site***

45 It is hypothesised that the provision of facilitated access to the website will lead to an  
46 increase in alcohol screening rates in the trial practices. A sub-study will therefore be carried  
47 out comparing pre- and post-trial alcohol screening rates in the participating practices,  
48 calculated on the basis of entries in the electronic care records of patients attending over a  
49 six month period. Further comparison will be carried out with a matched control group of  
50 practices who did not participate in the EFAR trial.  
51  
52  
53  
54  
55  
56  
57  
58  
59  
60

### *Discussion*

The trial has several strengths. The research team includes international expertise and the protocol benefits from extensive experience gained through the EFAR FVG trial, which has recruited well and achieved high rates of follow-up. Recruitment of PHCPs will be achieved using an established, structured and well-trained network which has been involved in previous alcohol projects including ODHIN, PHEPA and Beveu Menys . The trainers have also had extensive experience of SBI training, and the network includes both nursing and medical professionals, thus offering the potential to recruit a wide range of patients. It is the first trial testing the utility of facilitated access in Spain. It is done in the context of the daily work of primary Health care professionals and can be embedded in the alcohol SBI activities undertaken in Catalonia until now. It is a natural evolution of the work being done and if results are positive such a website could be included in the future in the personal file of PHC and promoted as a complementary tool throughout all PHC centres

There may be initial professional resistance to engaging with facilitated access activity as the trial will be carried out by PHCP's with little or no experience of promoting the use of the internet for the delivery of alcohol screening and brief intervention. However, we have taken account of this by using conservative estimates in calculating the anticipated facilitated access rates, and will offer training to all the participating PHCPs in order to overcome usability problems. The current version of the website has been well-accepted by Italian professionals and patients (26) and all the professionals participating in the EFAR Spain trial will be invited to familiarise themselves with the website prior to the start of the trial. Furthermore, the research team will provide continuous support though e-mail, an Internet forum and by telephone. Support materials will also be provided, including Frequently Asked Questions (FAQs), feedback data and alcohol-related problems management documents.

It is likely that a degree of selection bias will result from increased participation by younger and better educated patients likely to be more familiar with the Internet. However, baseline assessment will provide data on a range of demographics, enabling comparisons to be made with the general population. While it is also possible that the trial will select more motivated participants who are especially concerned about their alcohol use, randomisation should ensure that these effects are equally distributed between the intervention and control groups.

In conclusion, while the trial poses significant challenges, it also has the benefit of international experience and expertise and delivery by PCHPs from a structured network with extensive previous experience.

### Author affiliations

1 GRAC. Addictions Unit. Department of Psychiatry, Clinical Institute of Neuroscience, Hospital Clínic. Fundació Clínic Recerca Biomèdica (FCRB), RETICS, Barcelona, Spain.

2 GRAC. Addictions Unit. Department of Psychiatry, Clinical Institute of Neuroscience, Hospital Clínic. Institut d'Investigacions Biomèdiques August Pi i Sunyer (IDIBAPS), RETICS, Barcelona, Spain.

3 Department of Primary Care and Population Health, University College London, London, UK

4 Program on Substance Abuse, Public Health Agency, Government of Catalonia, Barcelona, Spain

5 Region Friuli Venezia Giulia, Regional Centre for the Training in Primary Care, Monfalcone, Italy

### Contributors

HL, AG, LS and PW are the principal investigators who designed the study and drafted the article. Other authors have made substantial contributions to the conception and design of the project. All authors read and approved the final manuscript.

### Funding

This work has been funded by project PI042924 integrated in the National R + D + I and funded by the Carlos III Health Institute-Deputy General Assessment and the European Regional Development Fund (ERDF)." ([www.isciii.es](http://www.isciii.es)). They have no responsibility for study design; collection, management, analysis, and interpretation of data; writing of the report; and the decision to submit the report for publication.

### Competing interest

Antoni Gual has received honoraria, research grants and travel grants from Lundbeck Janssen, Pfizer, Lilly, Abbvie D&A Pharma, and Servier. Hugo López-Pelayo has received travel grants from Lundbeck, Lilly, Janssen, Pfizer, Rovi and Esteve. Other authors have no conflicts of interest.

### Dissemination policy

Trial results will be communicated by publications –preferably open-access journals-, , national (e.g. *Jornadas Socidrogalcohol*) and international meetings (e.g. INEBRIA) during 2016 and/or 2017.

Authorship of future results will include research team on behalf of EFAR-Spain group (all participants PHCPs)

### Ethics approval

The protocol was approved on P14/028 by the Ethics Committee, IDIAP Jordi Gol i Gurina. Any amendment protocol would be communicated to the ethics committee and published on [clinicaltrials.gov](http://clinicaltrials.gov).

### Acknowledgments

This work is supported by the following institutions: University College of London (UCL), Institut d'Investigacions Biomèdiques August Pi i Sunyer (IDIBAPS), Hospital Clínic i Universitari de Barcelona, and the Program on Substance Abuse (Public Health Agency, Government of Catalonia)

Technical support is provided by Daniel Berzon and Richard McGregor from Codeface. Special acknowledgments to all professionals participating in field work (EFAR Research Group) and members of XaROH.

For peer review only

## References

1. Gual A, Anderson P. A new AMPHORA: an introduction to the project Alcohol Measures for Public Health Research Alliance. *Addiction*. 2011 Mar;106:1-3.
2. Rehm J, Mathers C, Popova S, Thavorncharoensap M, Teerawattananon Y, Patra J. Alcohol and Global Health 1 Global burden of disease and injury and economic cost attributable to alcohol use and alcohol-use disorders. *Lancet*. 2009 Jun-Jul;373(9682):2223-33.
3. Segura Garcia L, Gual Sole A, Montserrat Mestre O, Bueno Belmonte A, Colom Farran J. Detection and handling of alcohol problems in primary care in Catalonia. *Atencion primaria / Sociedad Espanola de Medicina de Familia y Comunitaria*. 2006 2006-May-31;37(9):484-8.
4. Wolstenholme A, Drummond C, Deluca P, Davey Z, Elzerbi C, Gual A, et al. Report on the mapping of European need and service provision for early diagnosis and treatment of alcohol use disorders 2013.
5. Drummond C, Wolstenholme A, Deluca P, Davey Z, Donoghue K, Elzerbi C, et al. Alcohol interventions and treatment in Europe. In: Anderson P, Braddick F, Reynolds J, Gual A, editors. *Alcohol Policy in Europe: Evidence from AMPHORA The AMPHORA project 2nd ed* 2013.
6. Kaner EFS, Dickinson HO, Beyer F, Pienaar E, Schlesinger C, Campbell F, et al. The effectiveness of brief alcohol interventions in primary care settings: A systematic review. *Drug and Alcohol Review*. 2009 May;28(3):301-23.
7. Anderson P, Chisholm D, Fuhr DC. Alcohol and Global Health 2 Effectiveness and cost-effectiveness of policies and programmes to reduce the harm caused by alcohol. *Lancet*. 2009 Jun-Jul;373(9682):2234-46.
8. Sheffield Uo. *Guidance: Prevention and early identification of alcohol use disorders in adults and young people 2009*.
9. Shakeshaft A, Fawcett J, Mattick RP, Richmond R, Wodak A, Harris MF, et al. Patient-driven computers in primary care: their use and feasibility. *Health Education*. 2006 2006;106(5):400-11.
10. Shakeshaft AP, Frankish CJ. Using patient-driven computers to provide cost-effective prevention in primary care: a conceptual framework. *Health Promotion International*. 2003 Mar;18(1):67-77.
11. Carey KB, Scott-Sheldon LAJ, Elliott JC, Bolles JR, Carey MP. Computer-delivered interventions to reduce college student drinking: a meta-analysis. *Addiction*. 2009 Nov;104(11):1807-19.
12. Champion KE, Newton NC, Barrett EL, Teesson M. A systematic review of school-based alcohol and other drug prevention programs facilitated by computers or the Internet. *Drug and Alcohol Review*. 2013 Mar;32(2):115-23.
13. Free C, Knight R, Robertson S, Whittaker R, Edwards P, Zhou W, et al. Smoking cessation support delivered via mobile phone text messaging (txt2stop): a single-blind, randomised trial. *Lancet*. 2011 Jul 2;378(9785):49-55.
14. Wallace P, Murray E, McCambridge J, Khadjesari Z, White IR, Thompson SG, et al. On-line Randomized Controlled Trial of an Internet Based Psychologically Enhanced Intervention for People with Hazardous Alcohol Consumption. *Plos One*. 2011 Mar 9;6(3).
15. ODHIN. The ODHIN (Optimizing delivery of health care interventions) project website. 2013; Available from: <http://www.odhinproject.eu/>.

- 1  
2  
3 16. Struzzo P, Scafato E, McGregor R, Della Vedova R, Verbano L, Lygidakis C, et al. A  
4 randomised controlled non-inferiority trial of primary care-based facilitated access to an  
5 alcohol reduction website (EFAR-FVG): the study protocol. *Bmj Open*. 2013 2013;3(2).  
6 17. Catalunya Gd. Programa "Beveu menys". 2014; Available from:  
7 [http://www20.gencat.cat/portal/site/canalsalut/menuitem.41e04b39494f1be3ba963bb4b0c0e1a0/?vgnextoid=e0684fb23d564310VgnVCM2000009b0c1e0aRCRD&vgnnextchannel=e0684fb23d564310VgnVCM2000009b0c1e0aRCRD&newLang=es\\_ES](http://www20.gencat.cat/portal/site/canalsalut/menuitem.41e04b39494f1be3ba963bb4b0c0e1a0/?vgnextoid=e0684fb23d564310VgnVCM2000009b0c1e0aRCRD&vgnnextchannel=e0684fb23d564310VgnVCM2000009b0c1e0aRCRD&newLang=es_ES).  
8  
9  
10 18. Segura L, Torres M, Vidal A, Gual A, Colom J, editors. Utility of internet based  
11 assessment tool to measure alcohol consumption 2013.  
12 19. Keurhorst MN, Anderson P, Spak F, Bendtsen P, Segura L, Colom J, et al.  
13 Implementing training and support, financial reimbursement, and referral to an internet-based  
14 brief advice program to improve the early identification of hazardous and harmful alcohol  
15 consumption in primary care (ODHIN): study protocol for a cluster randomized factorial  
16 trial. *Implementation Science*. 2013 Jan 24;8.  
17 20. Hester RK, Squires DD, Delaney HD. The Drinker's Check-up: 12-month outcomes  
18 of a controlled clinical trial of a stand-alone software program for problem drinkers. *Journal*  
19 *of Substance Abuse Treatment*. 2005 Mar;28(2):159-69.  
20 21. Linke S, McCambridge J, Khadjesari Z, Wallace P, Murray E. Development of a  
21 Psychologically Enhanced Interactive Online Intervention for Hazardous Drinking. *Alcohol*  
22 *and Alcoholism*. 2008 Nov-Dec;43(6):669-74.  
23 22. Gómez A, Conde A, Santana JM, Jorrín A. Diagnostic usefulness of brief versions of  
24 Alcohol Use Disorders Identification Test (AUDIT) for detecting hazardous drinkers in  
25 primary care settings. *Journal of Studies on Alcohol*. 2005;66(2):305-8.  
26 23. Contel Guillaumon M, Gual Sole A, Colom Farran J. Alcohol use disorders  
27 identification test (AUDIT): Translation and validation of Catalan and Spanish. Test para la  
28 identificacion de transtornos por uso de alcohol (AUDIT): Traducción y validación del audit  
29 al Catalan y Castellano. 1999;11(4):337-47.  
30 24. Badia X, Roset M, Montserrat S, Herdman M, Segura A. The Spanish version of the  
31 EuroQol: Description and applications. La versión española del EuroQol: Descripción y  
32 aplicaciones. 1999;112(SUPPL. 1):79-86.  
33 25. Badia X, Schiaffino A, Alonso J, Herdman M. Using the EuroQol 5-D in the Catalan  
34 general population: Feasibility and construct validity. *Quality of Life Research*.  
35 1998;7(4):311-22.  
36 26. Wallace, P., Struzzo, P., della Vedova, R., Tersar, C., Verbano, L., Lygidakis, H., ...  
37 Scafato, E.. Randomised controlled non-inferiority trial of primary care based facilitated  
38 access to an alcohol reduction website (EFAR-FVG). *Addiction Science & Clinical Practice*.  
39 (2013, September 4) BioMed Central Ltd. doi:10.1186/1940-0640-8-S1-A83  
40  
41  
42  
43  
44  
45  
46  
47  
48  
49  
50  
51  
52  
53  
54  
55  
56  
57  
58  
59  
60

**Word count: 2449**

**Abstract count: 300**

**Number of figures: 1**

**Number of tables: 0**

A randomised controlled non-inferiority trial of primary care-based facilitated access to an alcohol reduction website (EFAR Spain): the study protocol.

Hugo López-Pelayo<sup>1</sup>; Paul Wallace<sup>3</sup>; Lidia Segura<sup>4</sup>; Laia Miquel<sup>2</sup>; Estela Díaz<sup>4</sup>; Lidia Teixidó<sup>1</sup>; Begoña Baena<sup>4</sup>; Pierluigio Struzzo<sup>5</sup>; Jorge Palacio-Vieira<sup>4</sup>; Cristina Casajuana<sup>2</sup>; Joan Colom<sup>4</sup>; Antoni Gual<sup>2</sup>

#### **Author affiliations**

1 GRAC. Addictions Unit. Department of Psychiatry, Clinical Institute of Neuroscience, Hospital Clínic. Fundació Clínic Recerca Biomèdica (FCRB), RETICS, University of Barcelona. Barcelona, Spain.

2 GRAC. Addictions Unit. Department of Psychiatry, Clinical Institute of Neuroscience, Hospital Clínic. Institut d'Investigacions Biomèdiques August Pi i Sunyer (IDIBAPS), RETICS, University of Barcelona. Barcelona, Spain.

3 Department of Primary Care and Population Health, University College London, London, UK

4 Program on Substance Abuse, Public Health Agency, Government of Catalonia, Barcelona, Spain

5 Region Friuli Venezia Giulia, Regional Centre for the Training in Primary Care, Monfalcone, Italy

**Corresponding author:** Hugo López-Pelayo [hlopez@clinic.cat](mailto:hlopez@clinic.cat)



## Abstract

**Introduction:** Early identification (EI) and brief interventions (BIs) for risky drinkers are effective tools in primary care. Lack of time in daily practice has been identified as one of the main barriers to implementation of BI. There is growing evidence that facilitated access by primary health care professionals (PCHPs) to a web-based BI can be a time-saving alternative to standard face-to-face BIs but there is as yet no evidence about the effectiveness of this approach relative to conventional BI. The main aim of this study is to test non-inferiority of facilitation to a web-based BI for risky drinkers delivered by PHCP against face-to-face BI.

**Method and Analysis:** Randomised controlled non-inferiority trial comparing both interventions, to be performed in primary care health centres in Catalonia, Spain. Unselected adult patients attending participating centres will be given a leaflet inviting them to log on to a website to complete the AUDIT-C alcohol screening questionnaire. **Participants with positive results** will be requested online to complete a trial module including consent, baseline assessment and randomisation to either face to face brief intervention by the practitioner or brief intervention via the alcohol reduction website. Follow up assessment of risky drinking will be undertaken online at 3 months and 1 year using the full AUDIT and D5-EQD5 scale. Proportions of risky drinkers in each group will be calculated and non-inferiority assessed against a specified margin of 10%. Assuming reduction of 30% of risky drinkers receiving standard intervention, 1000 patients will be required to give 90% power to reject the null hypothesis

**Ethics and dissemination:** The protocol was approved by the Ethics Committee of IDIAP Jordi Gol i Gurina P14/028. The findings of the trial will be disseminated through peer-reviewed journals, national and international conference presentations.

**Registration details:** Trial registration number [ClinicalTrials.gov](http://ClinicalTrials.gov) NCT02082990

**Protocol version:** 2. October 2014

## Introduction

Risky drinking is a worldwide public health problem. 74% of Europeans aged 15 years or older drink alcohol and 15 % of them (58 million people) drink above the recommended level (1). Around the world, 3,8% of premature deaths and 4,6% of Disability Adjusted Life Years (DALYs) lost are attributable to alcohol use (2).

In Catalonia, one out of five patients attending primary health care are risky drinkers (3). However, the proportion of people who access treatment out of those who need it varies from just 4% (Germany) to 23% (Italy). In Spain, the percentage of the in-need population accessing treatment is 15.3% (4, 5)

Early Identification (EI) and brief intervention (BI) are among the most effective approaches for risky drinkers in primary health care (6, 7) However, there is an important gap between research and clinical practice (8). Less than 10% of risky drinkers attended in primary health care benefit from BI (7). The main barriers to implementing EI&BI in primary care are time constraints, lack of financial incentives, insufficient training or absence of services to refer patient to, and risk of upsetting patient (4). Web-Based Brief Interventions (e-BI) are an alternative to improve the implementation, acceptance and viability of BI and to overcome barriers which have hampered their use in daily practice (9, 10). The provision of facilitated access by primary care professionals to an alcohol reduction website could significantly increase brief intervention rates by offering a time-saving alternative to face to face intervention. Many studies have shown the efficacy of computer-based interventions in getting college students to reduce their alcohol consumption (11, 12). The use of new technologies for mental health problems is becoming common in primary care, as for example in smoking cessation (13). A review of trials of computer based interventions in college drinkers found them to be more effective than no treatment and as effective as alternative treatment approaches (11).

Down Your Drink (<http://www.downyourdrink.org.uk>) is an online intervention developed in United Kingdom based on BI, cognitive-behaviour therapy, self-control therapy and motivational interviewing. An online trial of Down Your Drink indicated potentially significant reductions in alcohol consumption and risky drinking behaviours in subjects who used the trial websites (14) and following this, a number of initiatives have been initiated to test the acceptability and effectiveness of facilitating access to websites of this kind in primary care settings. The EU-funded ODHIN trial (15) currently underway in 5 European countries is designed to determine the impact of facilitated access on levels of implementation of brief interventions by primary care practitioners. The EFAR FVG study in the Friuli Venezia Giulia region in Northern Italy (16) has been designed to test the effectiveness relative to face to face intervention of facilitated access to an Italian version of DownYourDrink by general practitioners. This trial involves 40 general practices and has recruited more than 500 patients(16). EFAR-Spain is based on EFAR-FVG, but there are the following differences: 1) participation is open to both doctors and nurses; 2) Primary health care centres are constituted by a team of different professionals (nursing, medicine, social work, administration, etc). 3) The website has been not only translated but also adapted to the Spanish culture.

In Catalonia, no efficacy studies on e-BI exist. However, some limited e-BI initiatives have been undertaken in order to support the implementation of the “Beveu Menys” program (17), a program aimed at implementing EI&BI by, among other strategies, identifying a Network of Alcohol Referents in Primary Health Care (XaROH) throughout the territory and

1  
2  
3 providing continuous training and support to them. An on-line quantity-frequency tool was  
4 developed and promoted to be used as general population awareness-raising tool with  
5 promising results (18). More recently, in the context of the ODHIN project (19), an e-BI tool,  
6 adapted from Drinkers Check-Up (20), was used to test facilitated access only but results are  
7 still under analysis.  
8

9 We present the protocol of a randomised controlled non-inferiority trial (1:1) which aims to  
10 test non-inferiority of a web-based BI for risky drinkers against a traditional face-to-face BI  
11 delivered by PHCP (nurse and GPs).  
12  
13

## 14 Method

15  
16 **Trial design:** Randomized non-inferiority controlled trial in primary care comparing  
17 facilitated access to web-site for risky drinkers with standard face-to-face BI. With the  
18 exception of the non-experimental intervention, all components of the study will be  
19 administered online to patients. Patients will be actively encouraged by their primary health  
20 care professional to access to the application which is available on the web-site of the  
21 program “Alcohol y Salud” ([www.alcoholysalud.cat](http://www.alcoholysalud.cat)), and will be provided with a unique  
22 registration code.  
23

24 **The trial web-site** is a Spanish adaptation of the English version of  
25 [www.DownYourDrink.org.uk](http://www.DownYourDrink.org.uk) (DYD) developed in the UK, which includes modules for all the  
26 key trial components including screening, consent, assessment, randomisation and follow-  
27 up. It also incorporates the alcohol reduction website for the patients in the experimental  
28 group. The site has been adapted from the [www.DownYourDrink.org.uk](http://www.DownYourDrink.org.uk) (DYD) website  
29 developed for the DYD-RCT trial (14). Details of DYD and the psychological theory which  
30 underpinned its development have been reported elsewhere(21). Country-specific  
31 information such as recommended guidelines for alcohol intake, definitions of standard  
32 drinks and alcohol-related laws will be included. The website also incorporates a menu-  
33 driven facility to enable PHCP to customize automated messages to patients, for example by  
34 adding photographs and pre-recorded messages. The personalised messages will appear to  
35 each patient using the log-in code provided by that practitioner.  
36  
37

38 **Practitioner recruitment, training and incentives:** Recruitment will be based on the XaROH  
39 network. A 3-hour seminar on new technologies and EI&BI, introducing the trial, will be  
40 offered to all members of the XaROH and those attending will be invited to sign up for the  
41 trial. In addition, several advertisements will be posted on the “Beveu Menys” platform  
42 offering participation in the trial. In selecting practices, preference will be given to those  
43 with at least 5000 registered patients. Those practices which are selected as participants will  
44 be required to undergo a one day training programme. The training has four steps: 1)  
45 Introduction to trial; 2) Familiarisation with website; 3) Update about EI&BI; 4) Practice in  
46 EI&BI (Role-playing). Finally, participants will be encouraged to use the web-site and tailor  
47 patient messages. Participating PHCPs will receive a financial incentive of €20 per patient  
48 recruited to the trial.  
49  
50  
51  
52  
53  
54  
55  
56  
57  
58  
59  
60

### **Patient eligibility**

**Inclusion criteria:** patients aged 18 years or older attending the participating practices during the study period.

**Exclusion criteria:** those suffering from severe psychiatric disorders, serious visual impairment or terminal illness, those having inadequate command of the Spanish or Catalan language, or AUDIT  $\geq$  18 in baseline assessment. Excluded patients will be referred to PHCP to consider other interventions.

**Screening and Consent:** Eligible patients will be given a trial brochure by their GP or nurse and actively encouraged to access the specially designed website "[www.alcoholysalud.cat](http://www.alcoholysalud.cat)." Each brochure will include a unique access number which will enable the patient to log on to the website. All patients who access the web-site will be informed about the trial and asked to complete an online form confirming that they do not meet any of the exclusion criteria and inviting them to complete the online consent module. They will then be asked to complete an online version of the short Alcohol Use Disorders Identification Test (AUDIT-C) (22). Cut-off points for the purpose of the trial will be 4 for women and 5 for men. Those screening negative will be informed that their responses indicated acceptable drinking patterns according to national guidelines and will be encouraged not to increase their alcohol consumption. Those scoring at or above the cut-off point will be invited by tailored online message from their PCHP to take part in the study as they present a risky drinking pattern (See figure 1).

**Baseline assessment:** includes a demographic questionnaire (age, gender, level of education and occupation), the 10- question Alcohol Use Disorder Test Spanish version (23) and D5-EQ D5, the quality-of-life questionnaire, validated in Spanish versions (24, 25).

**Randomisation and intervention:** Those patients who complete the baseline assessment will undergo automated online randomisation by a specific module of website (1:1). Experimental group patients will be taken direct to the registration page of the alcohol reduction website "Alcohol y Salud" ([www.alcoholysalud.cat](http://www.alcoholysalud.cat)), where they will receive a personalised message from the PHCP who gave them the brochure with tailored feedback about their responses to the alcohol questionnaires. Personalised online messages from their PHCP will inform the patients of the importance of adopting healthy drinking choices and will encourage them to spend at least 15 minutes engaging with the alcohol reduction website in the first instance. Each participating PHCP will have access to the section of website enabling them to personalize their messages. (see "Trial website"). Patients will also receive an email one week later encouraging them to log on again to review their alcohol consumption. Online messages will also encourage the patients to discuss their website experience when they next see their PHCP.

**Control** group patients will receive an online message asking them to make an appointment to see their PCHP to discuss their drinking, and an automatically generated e-mail will also be sent to their PCHP to set up a visit in the next 7-10 days. At the appointment, the patient will receive a face to face brief motivational interview with the following components: 1) Assessment of the motivation to change. 2) Assessment of the stage of change. 3) Advice on changing drinking pattern. 4) Empathy. 5) Capacity Building.

Non-attenders will be offered up to three additional recalls.

### **Follow-up assessment**

Follow-up will take place at 3 and 12 months after randomisation, and each assessment will consist of the following instruments:

1. The 10-question AUDIT validated Spanish version.

1  
2  
3 2. The EQ-5D-5 self-complete Spanish version (<http://www.euroqol.org/eq-5d-products/eq-5d-5l.html>)

4  
5 Up to 3 attempts by e-mail will be made to ensure follow-up. The last attempt will be made  
6 by PHCP by letter, phone or in person. There are no **restrictions to concomitant care**.

### 7 8 9 **Data security and storage**

10 In order to ensure the security of personal data of participating patients and healthcare  
11 professionals, the site will be hosted on its own separate server which will be maintained  
12 and monitored closely throughout the project.

13 All communication between participants or PHCP and the web server will take place over an  
14 encrypted "http" connection.

15 Similarly, any interaction with the web-server by research staff or technical maintenance  
16 staff will be over a secure connection.

17 Access to the website and web server will be restricted to a small number of research and  
18 technical staff. The data will be collected and stored in accordance with best practices. All  
19 data outcome data will be anonymised and identifiable only by a patient's unique ID and  
20 code.

21 Access to the final trial dataset will be limited to the research team.

### 22 23 24 25 26 **Statistical analysis**

27 The primary outcome will be the proportion of patients classified as risky drinkers by the  
28 AUDIT-10 at month 3 after the randomization.

29 Aiming to assess the non-inferiority of facilitated access compared with standard face-to-  
30 face intervention, the proportion of risky drinkers in both groups will be compared using  
31 generalised non-linear mixed models. Non-inferiority will be considered if the difference  
32 between groups is not greater than 10%. Based on an anticipated reduction of 30% in the  
33 proportion of risky drinkers in control group and an overall attrition of 10%, it is calculated  
34 that 500 patients in each group will be needed to reject the null hypothesis (facilitated  
35 access is inferior to standard face-to-face intervention) with 90% power.

36  
37  
38 **No interim analysis is planned.**

39  
40 All analysis details will be set up in a pre-designated statistical analysis plan before the data  
41 are accessed.

### 42 43 44 **Impact on screening rates of facilitated access to the web-site**

45 It is hypothesised that the provision of facilitated access to the website will lead to an  
46 increase in alcohol screening rates in the trial practices. A sub-study will therefore be carried  
47 out comparing pre- and post-trial alcohol screening rates in the participating practices,  
48 calculated on the basis of entries in the electronic care records of patients attending over a  
49 six month period. Further comparison will be carried out with a matched control group of  
50 practices who did not participate in the EFAR trial.

### *Discussion*

The trial has several strengths. The research team includes international expertise and the protocol benefits from extensive experience gained through the EFAR FVG trial, which has recruited well and achieved high rates of follow-up. Recruitment of PHCPs will be achieved using an established, structured and well-trained network which has been involved in previous alcohol projects including ODHIN, PHEPA and Beveu Menys . The trainers have also had extensive experience of SBI training, and the network includes both nursing and medical professionals, thus offering the potential to recruit a wide range of patients. It is the first trial testing the utility of facilitated access in Spain. It is done in the context of the daily work of primary Health care professionals and can be embedded in the alcohol SBI activities undertaken in Catalonia until now. It is a natural evolution of the work being done and if results are positive such a website could be included in the future in the personal file of PHC and promoted as a complementary tool throughout all PHC centres

There may be initial professional resistance to engaging with facilitated access activity as the trial will be carried out by PHCP's with little or no experience of promoting the use of the internet for the delivery of alcohol screening and brief intervention. However, we have taken account of this by using conservative estimates in calculating the anticipated facilitated access rates, and will offer training to all the participating PHCPs in order to overcome usability problems. The current version of the website has been well-accepted by Italian professionals and patients (26) and all the professionals participating in the EFAR Spain trial will be invited to familiarise themselves with the website prior to the start of the trial. Furthermore, the research team will provide continuous support though e-mail, an Internet forum and by telephone. Support materials will also be provided, including Frequently Asked Questions (FAQs), feedback data and alcohol-related problems management documents.

It is likely that a degree of selection bias will result from increased participation by younger and better educated patients likely to be more familiar with the Internet. However, baseline assessment will provide data on a range of demographics, enabling comparisons to be made with the general population. While it is also possible that the trial will select more motivated participants who are especially concerned about their alcohol use, randomisation should ensure that these effects are equally distributed between the intervention and control groups.

In conclusion, while the trial poses significant challenges, it also has the benefit of international experience and expertise and delivery by PCHPs from a structured network with extensive previous experience.

### Author affiliations

1 GRAC. Addictions Unit. Department of Psychiatry, Clinical Institute of Neuroscience, Hospital Clínic. Fundació Clínic Recerca Biomèdica (FCRB), RETICS, Barcelona, Spain.

2 GRAC. Addictions Unit. Department of Psychiatry, Clinical Institute of Neuroscience, Hospital Clínic. Institut d'Investigacions Biomèdiques August Pi i Sunyer (IDIBAPS), RETICS, Barcelona, Spain.

3 Department of Primary Care and Population Health, University College London, London, UK

4 Program on Substance Abuse, Public Health Agency, Government of Catalonia, Barcelona, Spain

5 Region Friuli Venezia Giulia, Regional Centre for the Training in Primary Care, Monfalcone, Italy

### Contributors

HL, AG, LS and PW are the principal investigators who designed the study and drafted the article. Other authors have made substantial contributions to the conception and design of the project. All authors read and approved the final manuscript.

### Funding

This work has been funded by project PI042924 integrated in the National R + D + I and funded by the Carlos III Health Institute-Deputy General Assessment and the European Regional Development Fund (ERDF)." ([www.isciii.es](http://www.isciii.es)). They have no responsibility for study design; collection, management, analysis, and interpretation of data; writing of the report; and the decision to submit the report for publication.

### Competing interest

Antoni Gual has received honoraria, research grants and travel grants from Lundbeck Janssen, Pfizer, Lilly, Abbvie D&A Pharma, and Servier. Hugo López-Pelayo has received travel grants from Lundbeck, Lilly, Janssen, Pfizer, Rovi and Esteve. Other authors have no conflicts of interest.

### Dissemination policy

Trial results will be communicated by publications –preferably open-access journals-, , national (e.g. *Jornadas Socidrogalcohol*) and international meetings (e.g. INEBRIA) during 2016 and/or 2017.

Authorship of future results will include research team on behalf of EFAR-Spain group (all participants PHCPs)

### Ethics approval

The protocol was approved on P14/028 by the Ethics Committee, IDIAP Jordi Gol i Gurina. Any amendment protocol would be communicated to the ethics committee and published on [clinicaltrials.gov](http://clinicaltrials.gov).

### Acknowledgments

This work is supported by the following institutions: University College of London (UCL), Institut d'Investigacions Biomèdiques August Pi i Sunyer (IDIBAPS), Hospital Clínic i Universitari de Barcelona, and the Program on Substance Abuse (Public Health Agency, Government of Catalonia)

Technical support is provided by Daniel Berzon and Richard McGregor from Codeface. Special acknowledgments to all professionals participating in field work (EFAR Research Group) and members of XaROH.

For peer review only



Figure 1. Flowchart: recruitment process.

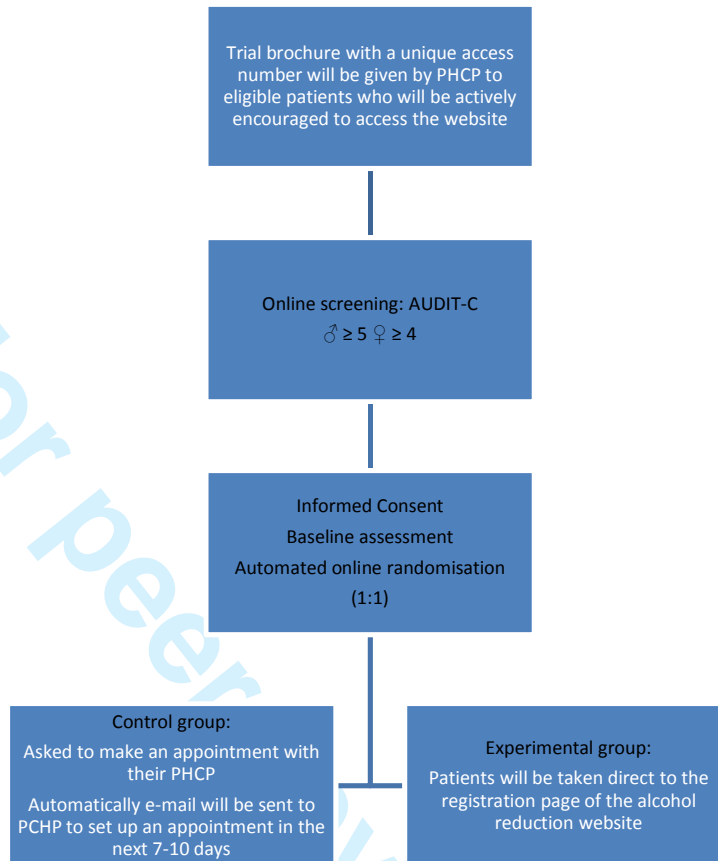

## References

1. Gual A, Anderson P. A new AMPHORA: an introduction to the project Alcohol Measures for Public Health Research Alliance. *Addiction*. 2011 Mar;106:1-3.
2. Rehm J, Mathers C, Popova S, Thavorncharoensap M, Teerawattananon Y, Patra J. Alcohol and Global Health 1 Global burden of disease and injury and economic cost attributable to alcohol use and alcohol-use disorders. *Lancet*. 2009 Jun-Jul;373(9682):2223-33.
3. Segura Garcia L, Gual Sole A, Montserrat Mestre O, Bueno Belmonte A, Colom Farran J. Detection and handling of alcohol problems in primary care in Catalonia. *Atencion primaria / Sociedad Espanola de Medicina de Familia y Comunitaria*. 2006 2006-May-31;37(9):484-8.
4. Wolstenholme A, Drummond C, Deluca P, Davey Z, Elzerbi C, Gual A, et al. Report on the mapping of European need and service provision for early diagnosis and treatment of alcohol use disorders 2013.
5. Drummond C, Wolstenholme A, Deluca P, Davey Z, Donoghue K, Elzerbi C, et al. Alcohol interventions and treatment in Europe. In: Anderson P, Braddick F, Reynolds J, Gual A, editors. *Alcohol Policy in Europe: Evidence from AMPHORA The AMPHORA project 2nd ed* 2013.
6. Kaner EFS, Dickinson HO, Beyer F, Pienaar E, Schlesinger C, Campbell F, et al. The effectiveness of brief alcohol interventions in primary care settings: A systematic review. *Drug and Alcohol Review*. 2009 May;28(3):301-23.
7. Anderson P, Chisholm D, Fuhr DC. Alcohol and Global Health 2 Effectiveness and cost-effectiveness of policies and programmes to reduce the harm caused by alcohol. *Lancet*. 2009 Jun-Jul;373(9682):2234-46.
8. Sheffield Uo. *Guidance: Prevention and early identification of alcohol use disorders in adults and young people 2009*.
9. Shakeshaft A, Fawcett J, Mattick RP, Richmond R, Wodak A, Harris MF, et al. Patient-driven computers in primary care: their use and feasibility. *Health Education*. 2006 2006;106(5):400-11.
10. Shakeshaft AP, Frankish CJ. Using patient-driven computers to provide cost-effective prevention in primary care: a conceptual framework. *Health Promotion International*. 2003 Mar;18(1):67-77.
11. Carey KB, Scott-Sheldon LAJ, Elliott JC, Bolles JR, Carey MP. Computer-delivered interventions to reduce college student drinking: a meta-analysis. *Addiction*. 2009 Nov;104(11):1807-19.
12. Champion KE, Newton NC, Barrett EL, Teesson M. A systematic review of school-based alcohol and other drug prevention programs facilitated by computers or the Internet. *Drug and Alcohol Review*. 2013 Mar;32(2):115-23.
13. Free C, Knight R, Robertson S, Whittaker R, Edwards P, Zhou W, et al. Smoking cessation support delivered via mobile phone text messaging (txt2stop): a single-blind, randomised trial. *Lancet*. 2011 Jul 2;378(9785):49-55.
14. Wallace P, Murray E, McCambridge J, Khadjesari Z, White IR, Thompson SG, et al. On-line Randomized Controlled Trial of an Internet Based Psychologically Enhanced Intervention for People with Hazardous Alcohol Consumption. *Plos One*. 2011 Mar 9;6(3).
15. ODHIN. The ODHIN (Optimizing delivery of health care interventions) project website. 2013; Available from: <http://www.odhinproject.eu/>.

- 1  
2  
3 16. Struzzo P, Scafato E, McGregor R, Della Vedova R, Verbano L, Lygidakis C, et al. A  
4 randomised controlled non-inferiority trial of primary care-based facilitated access to an  
5 alcohol reduction website (EFAR-FVG): the study protocol. *Bmj Open*. 2013 2013;3(2).  
6 17. Catalunya Gd. Programa "Beveu menys". 2014; Available from:  
7 [http://www20.gencat.cat/portal/site/canalsalut/menuitem.41e04b39494f1be3ba963bb4b0c0e1a0/?vgnextoid=e0684fb23d564310VgnVCM2000009b0c1e0aRCRD&vgnnextchannel=e0684fb23d564310VgnVCM2000009b0c1e0aRCRD&newLang=es\\_ES](http://www20.gencat.cat/portal/site/canalsalut/menuitem.41e04b39494f1be3ba963bb4b0c0e1a0/?vgnextoid=e0684fb23d564310VgnVCM2000009b0c1e0aRCRD&vgnnextchannel=e0684fb23d564310VgnVCM2000009b0c1e0aRCRD&newLang=es_ES).  
8  
9  
10 18. Segura L, Torres M, Vidal A, Gual A, Colom J, editors. Utility of internet based  
11 assessment tool to measure alcohol consumption 2013.  
12 19. Keurhorst MN, Anderson P, Spak F, Bendtsen P, Segura L, Colom J, et al.  
13 Implementing training and support, financial reimbursement, and referral to an internet-based  
14 brief advice program to improve the early identification of hazardous and harmful alcohol  
15 consumption in primary care (ODHIN): study protocol for a cluster randomized factorial  
16 trial. *Implementation Science*. 2013 Jan 24;8.  
17 20. Hester RK, Squires DD, Delaney HD. The Drinker's Check-up: 12-month outcomes  
18 of a controlled clinical trial of a stand-alone software program for problem drinkers. *Journal*  
19 *of Substance Abuse Treatment*. 2005 Mar;28(2):159-69.  
20 21. Linke S, McCambridge J, Khadjesari Z, Wallace P, Murray E. Development of a  
21 Psychologically Enhanced Interactive Online Intervention for Hazardous Drinking. *Alcohol*  
22 *and Alcoholism*. 2008 Nov-Dec;43(6):669-74.  
23 22. Gómez A, Conde A, Santana JM, Jorrín A. Diagnostic usefulness of brief versions of  
24 Alcohol Use Disorders Identification Test (AUDIT) for detecting hazardous drinkers in  
25 primary care settings. *Journal of Studies on Alcohol*. 2005;66(2):305-8.  
26 23. Contel Guillaumon M, Gual Sole A, Colom Farran J. Alcohol use disorders  
27 identification test (AUDIT): Translation and validation of Catalan and Spanish. Test para la  
28 identificacion de transtornos por uso de alcohol (AUDIT): Traducción y validación del audit  
29 al Catalan y Castellano. 1999;11(4):337-47.  
30 24. Badia X, Roset M, Montserrat S, Herdman M, Segura A. The Spanish version of the  
31 EuroQol: Description and applications. La versión española del EuroQol: Descripción y  
32 aplicaciones. 1999;112(SUPPL. 1):79-86.  
33 25. Badia X, Schiaffino A, Alonso J, Herdman M. Using the EuroQol 5-D in the Catalan  
34 general population: Feasibility and construct validity. *Quality of Life Research*.  
35 1998;7(4):311-22.  
36 26. Wallace, P., Struzzo, P., della Vedova, R., Tersar, C., Verbano, L., Lygidakis, H., ...  
37 Scafato, E.. Randomised controlled non-inferiority trial of primary care based facilitated  
38 access to an alcohol reduction website (EFAR-FVG). *Addiction Science & Clinical Practice*.  
39 (2013, September 4) BioMed Central Ltd. doi:10.1186/1940-0640-8-S1-A83  
40  
41  
42  
43  
44  
45  
46  
47  
48  
49  
50  
51  
52  
53  
54  
55  
56  
57  
58  
59  
60

1  
2  
3  
4  
5  
6  
7  
8  
9  
10  
11  
12  
13  
14  
15  
16  
17  
18  
19  
20  
21  
22  
23  
24  
25  
26  
27  
28  
29  
30  
31  
32  
33  
34  
35  
36  
37  
38  
39  
40  
41  
42  
43  
44  
45  
46  
47  
48  
49  
50  
51  
52  
53  
54  
55  
56  
57  
58  
59  
60

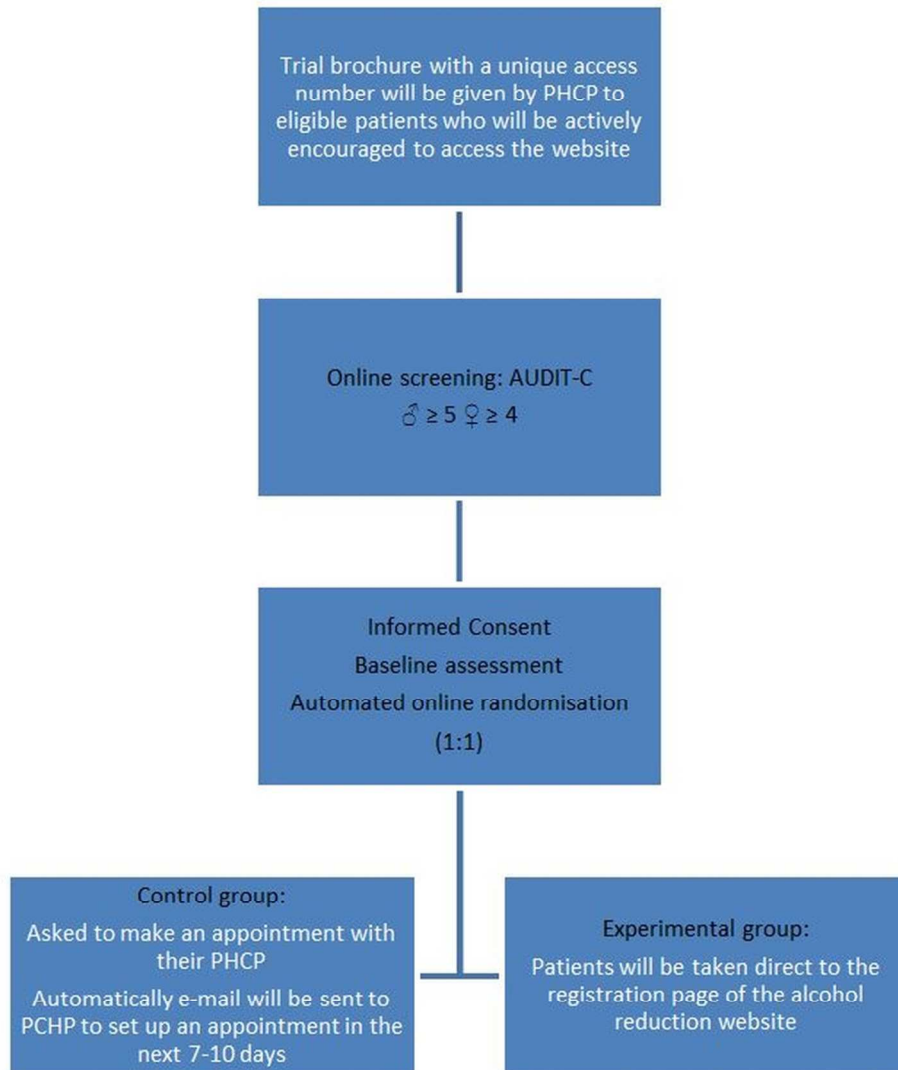

90x98mm (300 x 300 DPI)

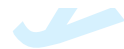

Supplement: bmjopen-2014-007130.draft_revisions.pdf [file bmjopen-2014-007130.draft_revisions.pdf]
