# Supplementary material for: A randomised controlled non-inferiority trial of primary care-based facilitated access to an alcohol reduction website (EFAR Spain): the study protocol
Source: PubMed Central journal article supplement — BMJ Open. 2014 Dec 31;4(12):e007130. doi: 10.1136/bmjopen-2014-007130 (PMC4281557; doi:10.1136/bmjopen-2014-007130), 2014-12-31
Supplement: bmjopen-2014-007130.reviewer_comments.pdf [file bmjopen-2014-007130.reviewer_comments.pdf]

## PEER REVIEW HISTORY

BMJ Open publishes all reviews undertaken for accepted manuscripts. Reviewers are asked to complete a checklist review form (<http://bmjopen.bmj.com/site/about/resources/checklist.pdf>) and are provided with free text boxes to elaborate on their assessment. These free text comments are reproduced below.

## ARTICLE DETAILS

|                            |                                                                                                                                                                                                         |
|----------------------------|---------------------------------------------------------------------------------------------------------------------------------------------------------------------------------------------------------|
| <b>TITLE (PROVISIONAL)</b> | A randomised controlled non-inferiority trial of primary care-based facilitated access to an alcohol reduction website (EFAR Spain): the study protocol.                                                |
| <b>AUTHORS</b>             | López-Pelayo, Hugo; Wallace, Paul; Segura, Lidia; Miquel, Laia; Diaz, Estela; Teixidó, Lidia; Baena, Begoña; Struzzo, Pierluigio; Palacio-Vieria, Jorge; Casajuana, Cristina; Colom, Joan; Gual, Antoni |

This article was not externally reviewed at BMJ Open. Protocols that have been independently assessed prior to submission to BMJ Open are usually fast-tracked to publication on the grounds that further substantial changes will not be possible. This independent assessment will usually be external, independent review for both a substantial grant award from a non-commercial or government funder and ethics approval.
